# Supplementary material for: PiSZ alpha-1 antitrypsin deficiency (AATD): pulmonary phenotype and prognosis relative to PiZZ AATD and PiMM COPD
Source: HighWire-hosted journal article supplement (doi:10.1136/thoraxjnl-2015-206906), 2015-07-03
Supplement: thoraxjnl-2015-206906supp.pdf [file thoraxjnl-2015-206906supp.pdf]

## SUPPLEMENTARY MATERIAL

### Supplementary table 1: Characteristics of key previous PiSZ cohorts

\*Patients included in the pooled analysis of COPD risk, based on clinical or spirometric diagnosis of COPD. Other analyses of clinical characteristics were reported in the paper.

#Primary purpose of the study was to ascertain AATD gene frequencies (PiS & Z) in a COPD clinic, where COPD was clinically diagnosed, rather than to study PiSZ per se

| Study                         | Study design  | N   | Age (yrs)                              | FEV1% predicted | Current or ex smokers | FEV1 decline (ml/year) | OR (95% CI) of COPD v PiMM |
|-------------------------------|---------------|-----|----------------------------------------|-----------------|-----------------------|------------------------|----------------------------|
| Dahl et al <sup>3</sup>       | Meta-analysis | 42* | Means for pooled analysis not reported |                 |                       |                        | 3.26 (1.24-8.57)           |
| Bartmann et al <sup>4</sup>   | Cohort#       | 18  | Not reported                           |                 |                       |                        | 24.46 (3.25-185.94)        |
| Holme et al <sup>8</sup>      | Cohort        | 63  | 50.6                                   | 84              | 73%                   | Not reported           |                            |
| Hutchison et al <sup>17</sup> | Cohort        | 25  | 51.3                                   | 75.6            | 88%                   | Not reported           |                            |
| Turino et al <sup>22</sup>    | Cohort        | 59  | 46.6                                   | 67              | 62%                   | Not reported           |                            |

### Supplementary table 2: Characteristics stratified by index status in PiSZ patients

Those patients who did not know why they had been tested were excluded from analysis. Data is shown as n (%) or *mean (SE)*

| Feature                | Lung Index<br>N=64 | Non-lung index<br>N=41 | p value |
|------------------------|--------------------|------------------------|---------|
| Male                   | 38 (59.4)          | 22 (53.7)              | 0.564   |
| Age                    | 55.4 (1.5)         | 43.5 (2.3)             | <0.001  |
| Smoking status         |                    |                        |         |
| Ex smoker              | 37 (57.8)          | 8 (19.5)               | <0.001  |
| Never smoked           | 15 (23.4)          | 25 (61.0)              |         |
| Current smoker         | 12 (18.8)          | 8 (19.5)               |         |
| Pack years smoked      | 26.2 (3.0)         | 9.0 (2.6)              | <0.001  |
| COPD                   | 43 (67.2)          | 8 (19.5)               | <0.001  |
| Emphysema              | 35 (54.7)          | 3 (7.3)                | <0.001  |
| Chronic bronchitis     | 18 (28.1)          | 6 (14.6)               | 0.175   |
| Bronchiectasis         | 11 (17.2)          | 7 (17.1)               | 0.778   |
| AAT level              | 14.9 (3.7)         | 13.5 (5.3)             | 0.034   |
| AAT <11µM              | 3 (4.7)            | 6 (14.6)               | 0.059   |
| FEV1pp                 | 76.5 (2.6)         | 106.4 (4.3)            | <0.001  |
| FEV1/FVC (%)           | 55.0 (2.7)         | 78.0 (1.7)             | <0.001  |
| TLCpp                  | 109.2(1.9)         | 104.2 (1.7)            | 0.059   |
| RVpp                   | 107.9 (4.6)        | 88.7 (3.9)             | 0.003   |
| DLCOpp                 | 76.5 (3.1)         | 97.3 (2.8)             | <0.001  |
| KCOpp                  | 78.1 (3.0)         | 95.8 (2.3)             | <0.001  |
| UZVI                   | 30.2(4.6)          | 9.9 (1.7)              | 0.005   |
| LZVI                   | 31.6 (5.2)         | 11.0 (2.0)             | 0.001   |
| UZ/LZVI                | 1.1 (0.1)          | 1.1 (0.2)              | 0.251   |
| Follow up time (years) | 7.8 (0.6)          | 9.3 (1.6)              | 0.894   |
| Deceased               | 7 (10.9)           | 1 (2.4)                | 0.145   |

### Supplementary table 3: Characteristics of smoke exposed & never smoking PiSZ and ZZ patients

Data is shown as n (%) or *median (IQR)*. In light of the known influence of smoke exposure on parameters shown here p values have not been computed between smokers and never smokers.

| Feature            | PiZZ smoke exposed<br>N=536 | PiSZ smoke exposed<br>N=66 | PiZZ never smoker<br>N=160 | PiSZ never smoker<br>N=60 |
|--------------------|-----------------------------|----------------------------|----------------------------|---------------------------|
| Male               | 329 (61.4)                  | 51 (77.3)                  | 75 (46.9)                  | 20 (33.3)                 |
| Age                | 49.7 (12.0)                 | 51.6 (14.0)                | 56.0 (23.0)                | 53.7 (15.0)               |
| Packyears smoked   | 19 (6.4)                    | 30 (34.3)                  | -                          | -                         |
| COPD               | 488 (91.0)                  | 53 (80.3)                  | 96 (60.0)                  | 13 (21.7)                 |
| FEV1≥80%           | 32 (6.0)                    | 11 (16.7)                  | 23 (14.4)                  | 7 (11.7)                  |
| 50-80%             | 132 (24.6)                  | 21 (31.8)                  | 33 (20.6)                  | 5 (8.3)                   |
| >30<50%            | 158 (29.5)                  | 15 (25.0)                  | 27 (16.9)                  | 0                         |
| <30%               | 166 (31.0)                  | 6 (9.1)                    | 13 (8.1)                   | 1 (1.7)                   |
| Emphysema          | 383 (71.5)                  | 36 (54.5)                  | 77 (48.1)                  | 4 (6.7)                   |
| Chronic bronchitis | 203 (37.9)                  | 21 (31.8)                  | 43 (26.9)                  | 5 (8.3)                   |
| Bronchiectasis     | 129 (24.1)                  | 8 (12.1)                   | 52 (32.5)                  | 11 (18.3)                 |
| FEV1pp             | 36.5 (33.0)                 | 81.0 (61.0)                | 74.3 (66.7)                | 110.0 (11.8)              |
| FEV1/FVC (%)       | 35.9 (22.4)                 | 60.0 (44.5)                | 58.0 (43.5)                | 82.0 (12.3)               |
| KCOpp              | 62.3 (26.5)                 | 92 (40.5)                  | 84.1 (37.8)                | 91.5 (18.5)               |
| UZVI               | 32.3 (28.4)                 | 20.7 (32.3)                | 19.9 (28.2)                | 12.7 (10.2)               |
| LZVI               | 51.6 (28.3)                 | 21.3 (31.4)                | 32.9 (39.5)                | 13.9 (15.9)               |
| UZ/LZVI            | 0.7 (0.4)                   | 0.8 (0.6)                  | 0.7 (0.4)                  | 1.0 (0.5)                 |
| Deceased           | 142 (26.5)                  | 9 (13.6)                   | 30 (18.8)                  | 1 (1.7)                   |

### Matched analysis PiSZ v PiZZ

Patients in the matched analysis had the following characteristics (medians): age 52.6 years, 15pack year smoke exposure, FEV1 52% predicted. 5 PiSZ patients could not be adequately matched to PiZZ due to high smoke exposure and were excluded. Comparisons of matched patients showed that all differences in lung disease phenotype remained as in the primary analysis, such that PiSZ patients had lower prevalence of emphysema and better lung function. Data on physiological decline was available in 66 PiSZ and 120 PiZZ patients respectively. There was no difference in annual decline of FEV1 or gas transfer (DLCO and KCO, all p>0.2) and PiSZ patients were less likely to die (7.9% v 20.6%, p=0.004).

### Supplementary table 4: FEV1 decline in other key PiZZ cohorts

| Study                                   | N   | Method of calculating FEV1 decline                             | FEV1 decline (ml/year)                          |
|-----------------------------------------|-----|----------------------------------------------------------------|-------------------------------------------------|
| Seersholm et al <sup>15</sup>           | 161 | Difference between 2 spirometries ≥1 year apart                | 81 (all patients)<br>52 (ex-smokers)            |
| AATD registry study group <sup>25</sup> | 927 | Regression of ≥2 spirometry measurements ≥1 year apart         | 54                                              |
| Hutchison et al <sup>17</sup>           | 71  | Regression of 6-13 spirometry measurements                     | 66.3                                            |
| Wu et al <sup>27</sup>                  | 80  | Regression of ≥2 spirometry measurements ≥6 months apart       | 60 (never & ex smokers)<br>80 (current smokers) |
| Burdon et al <sup>28</sup>              | 50  | Linear regression of ≥2 spirometry measurements over 2-6 years | 88                                              |
